# Supplementary material
Source: PubMed Central journal article supplement (PMC8106295)
Supplement: pnas.2101027118.sapp.pdf [file pnas.2101027118.sapp.pdf]

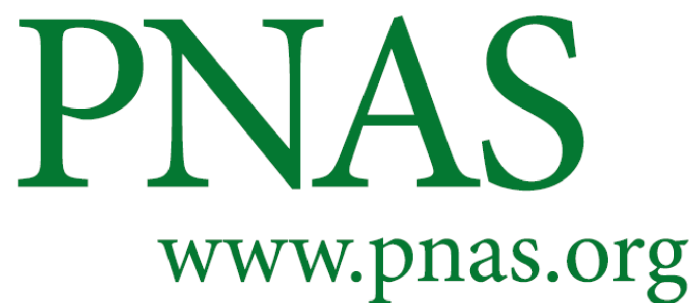

Supplementary Information for

**A Sos Proteomimetic as a Pan-Ras Inhibitor**

Seong Ho Hong,<sup>a†</sup> Daniel Y. Yoo,<sup>a†</sup> Louis Conway,<sup>b</sup> Khyle C. Richards-Corke,<sup>a</sup> Christopher G. Parker,<sup>b</sup> and Paramjit S. Arora<sup>a</sup>

<sup>a</sup>Department of Chemistry, New York University, New York, NY 10003. <sup>b</sup>Department of Chemistry, The Scripps Research Institute, Jupiter, FL 33458

**This PDF file includes:**

Figures S1 to S12  
Scheme S1  
Tables S1 to S6

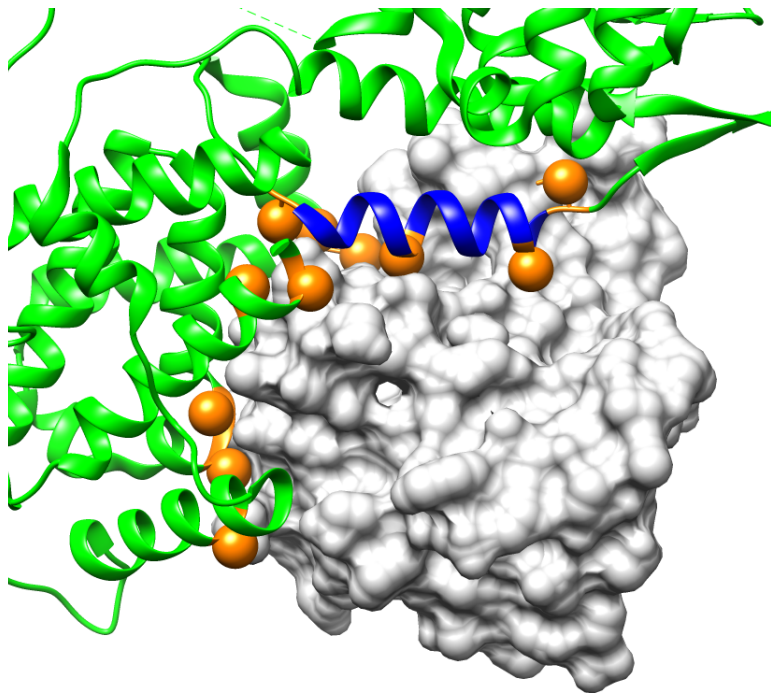

**Figure S1.** Alanine scanning mutagenesis of the Ras (light gray)-Sos (green) complex reveals critical Ras binding residues (orange spheres). Although, the energetically important binding residues are dispersed over the large Sos surface, the  $\alpha$ H helix (blue) contains a cluster of these residues thereby providing a lead helical domain for rational design of Ras ligands. (PDB: 1NVW).

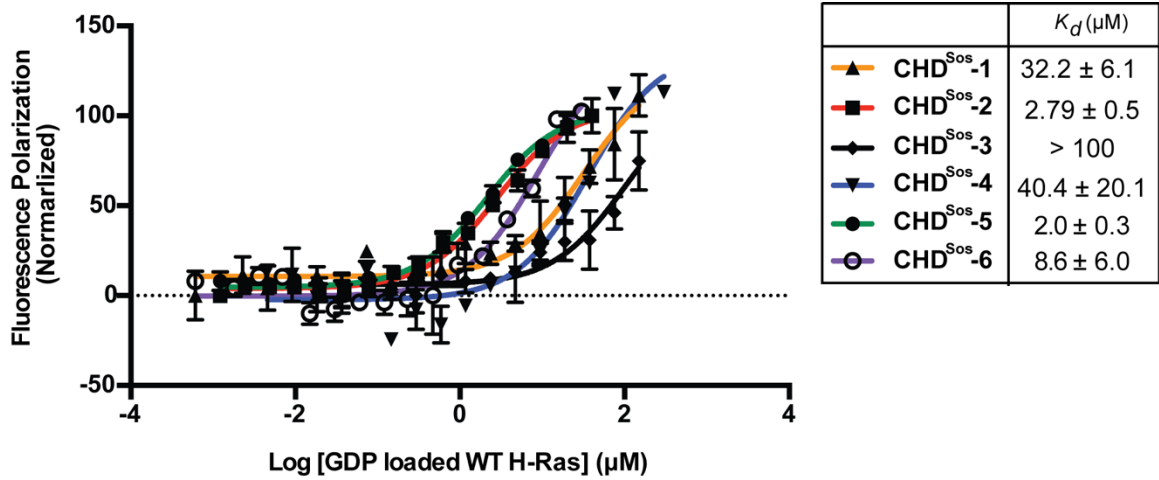

**Figure S2. Fluorescence polarization curves for binding of fluorescently-labeled CHDs and GDP-bound wild-type H-Ras.** The calculated dissociation constants ( $K_d$ ) for each CHD are listed in the Table. Error bars are mean  $\pm$  SD of triplicates.

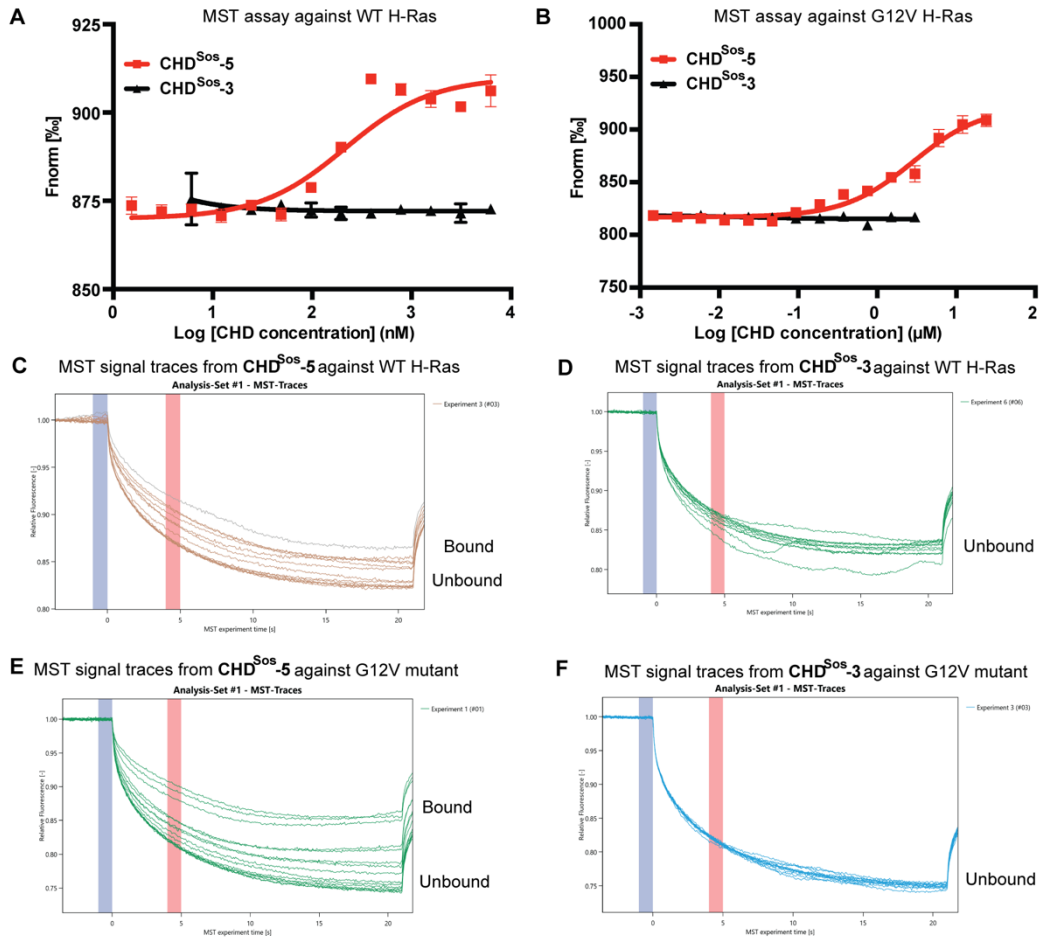

**Figure S3. Microscale thermophoresis analysis of CHD binding with and wild-type and mutant H-Ras labeled with AFDye 647.** A) Dose-response curve for interaction between CHD<sup>Sos-5</sup> and CHD<sup>Sos-3</sup> and wild-type H-Ras-GDP. (B) Dose-response curve for interaction between CHD<sup>Sos-5</sup> and CHD<sup>Sos-3</sup> and G12V H-Ras-GDP. Changes in TRIC signal observed from microscale thermophoresis are plotted as Fnorm vs. Ligand concentrations. Thermographs of wild-type H-Ras-GDP binding to (C) CHD<sup>Sos-5</sup> and (D) CHD<sup>Sos-3</sup>. Aggregation was observed with CHD<sup>Sos-3</sup> at concentration higher than 3 μM and interrupted binding isotherm. Thermographs of G12V H-Ras-GDP binding to (E) CHD<sup>Sos-5</sup> and (F) CHD<sup>Sos-3</sup>. Cold region (blue) is set to 0 sec and hot region (red) at 3 sec are used. Error bars are mean ± SD from triplicates.

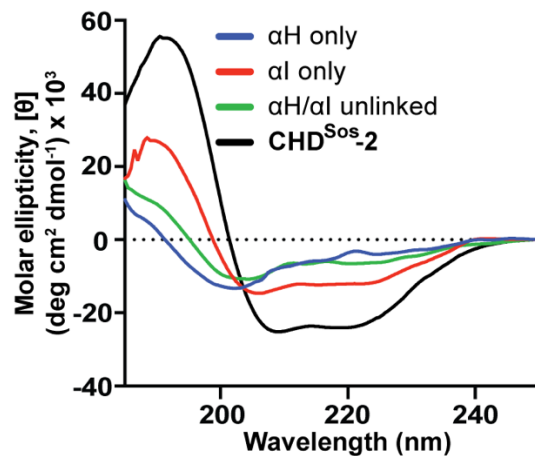

**Figure S4. Circular dichroism spectra of crosslinked and linear peptides.** CD spectra of the individual unlinked  $\alpha$ H and  $\alpha$ I peptides, equimolar mixture of the  $\alpha$ H and  $\alpha$ I peptides, and the **CHD<sup>Sos</sup>-2**. CD experiments were conducted in 50 mM aqueous potassium fluoride buffer (pH 7.5) with 20  $\mu$ M peptide concentration.

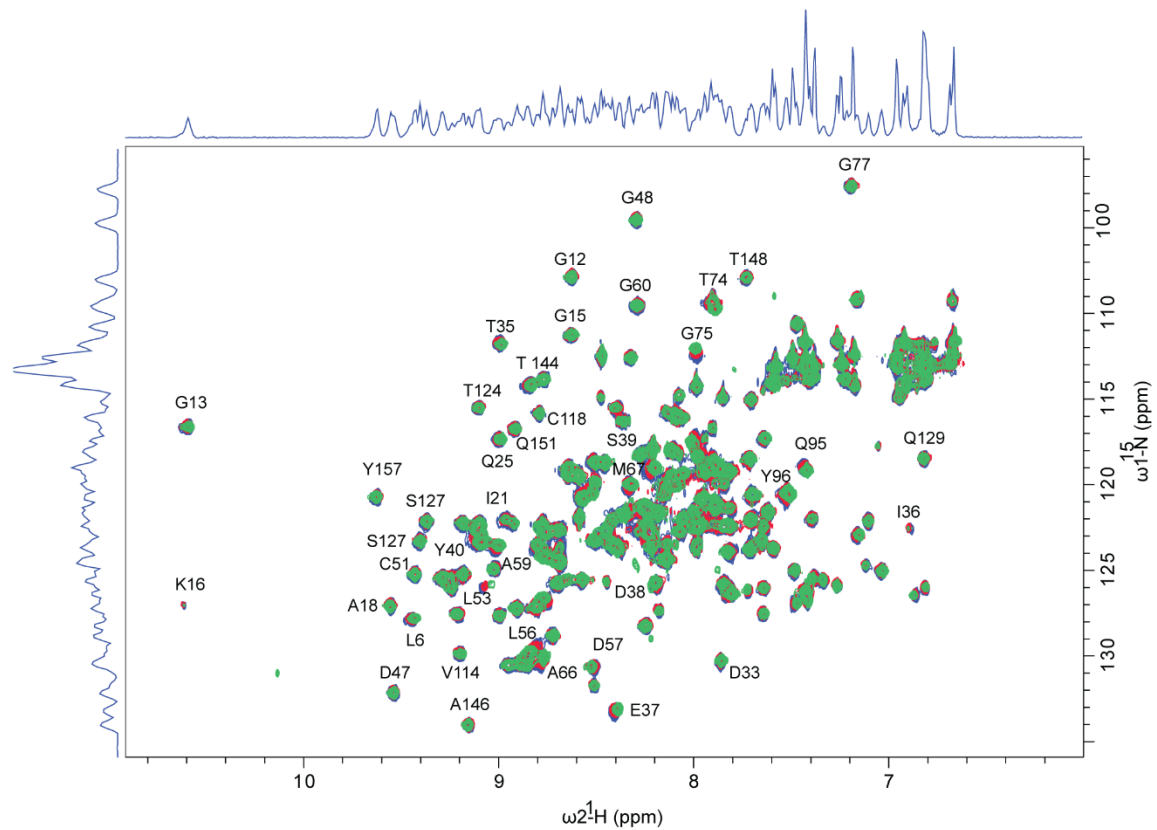

**Figure S5. Titration HSQC NMR spectroscopy reveals CHD<sup>Sos-5</sup>/Ras binding site.** <sup>1</sup>H-<sup>15</sup>N HSQC overlaid spectra of H-Ras alone (blue), H-Ras:CHD<sup>Sos-5</sup> (1:2.5, red), and H-Ras:CHD<sup>Sos-5</sup> (1:5, green).

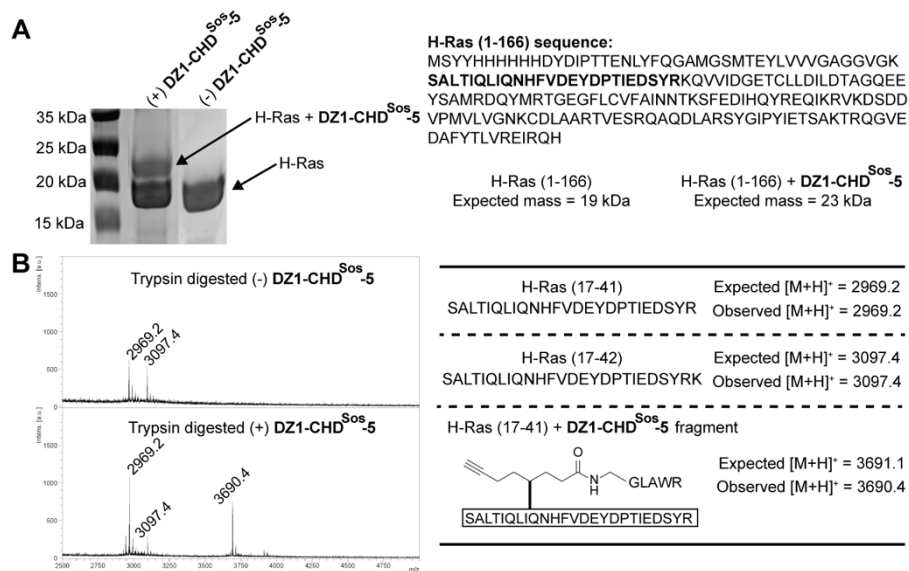

**Figure S6. Chemical crosslinking of diazirine-modified CHD<sup>Sos</sup>-5 supports Ras binding site.** (A) Gel shift assay with H-Ras incubated with and without **DZ1-CHD<sup>Sos</sup>-5**. (B) MALDI-TOF spectra displaying identified fragment masses of trypsin-digested **DZ1-CHD<sup>Sos</sup>-5** crosslinked to the Ras switch I loop. Corresponding labeled mass was not observed from the unlabeled Ras sample.

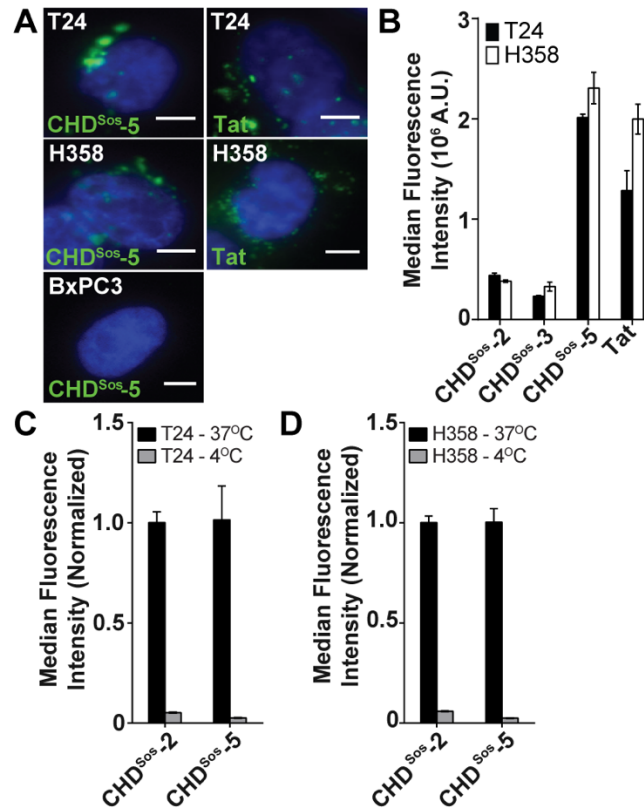

**Figure S7. Fluorescence microscopy and flow cytometry studies to analyze cellular uptake of CHDs.** (A) Live cell fluorescence imaging of Hoechst-stained Ras mutant T24, H358, and BxPC3 cells incubated with fluorescently-labeled peptides and DMSO (negative control) for 4 hours at 40X (scale bar = 5  $\mu$ m) magnification. Cells were exposed to 500 nM of CHDs and Tat. (B) Median fluorescence intensities in T24 and H358 cells post-treatment with 1  $\mu$ M **CHD<sup>Sos-2</sup>**, **CHD<sup>Sos-3</sup>**, and **CHD<sup>Sos-5</sup>** and Tat for 1 hour. (C) Flow cytometry analysis of fluorescently labeled **CHD<sup>Sos-5</sup>** (1  $\mu$ M) in indicated cell lines after 1 h treatment. (D) Error bars are mean  $\pm$  SD of biological duplicates.



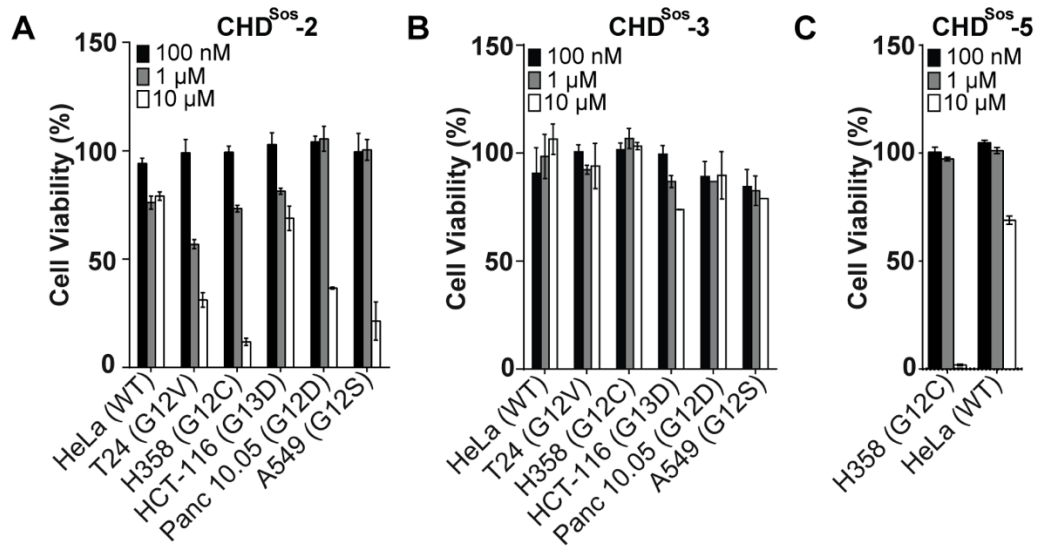

**Figure S8. MTT and CellTiter-Glo assays to determine cell viability in the presence of CHDs.** MTT cell viability in indicated Ras mutant and control cell lines treated with increasing concentrations of (A) **CHD<sup>Sos</sup>-2** and (B) **CHD<sup>Sos</sup>-3**. The cell viability studies were performed in the presence of serum. (C) Cell viability assessed by CellTiter-Glo assay in H358 and HeLa cells treated with increasing concentrations of **CHD<sup>Sos</sup>-5**. Error bars are mean  $\pm$  SD of biological triplicates.

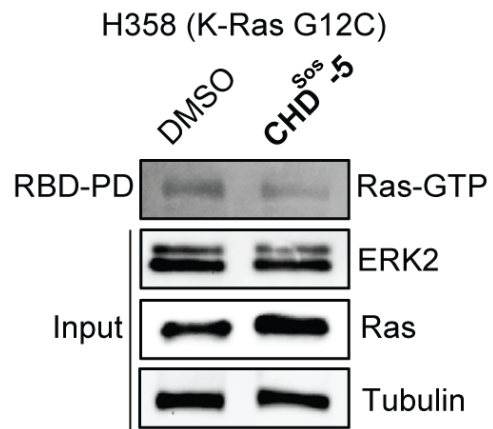

**Figure S9. Representative Western blots to probe the effect of CHD<sup>Sos</sup>-5 on the levels of active/GTP-bound Ras.** Ras-GTP levels were determined by immunoblotting with Ras-GTP-specific antibody after treatment of H358 cells with 10  $\mu$ M CHD<sup>Sos</sup>-5 for 6 hours.

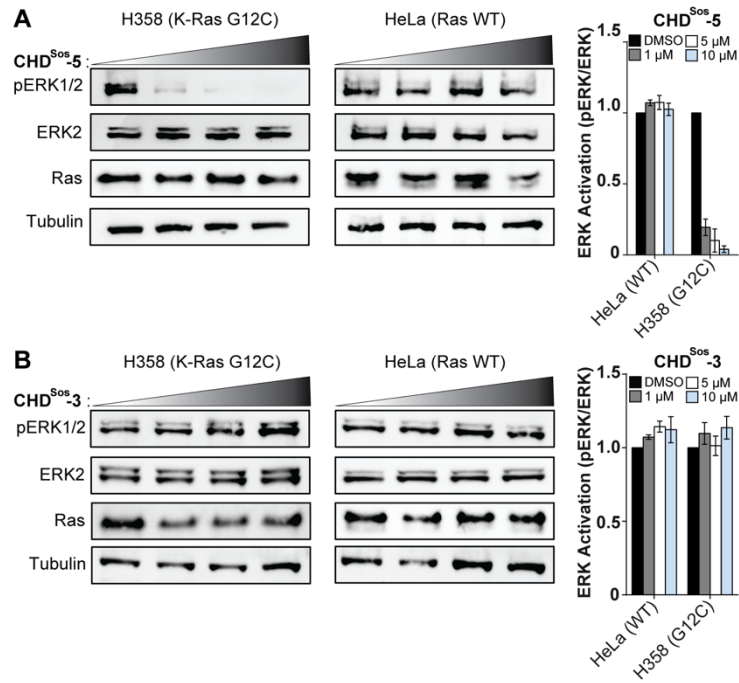

**Figure S10. Representative Western blots to analyze ERK phosphorylation.** Suppression of ERK phosphorylation by CHDs was probed in H358 and HeLa cells after treatment with (A) CHD<sup>Sos</sup>-5 and (B) CHD<sup>Sos</sup>-3 (DMSO, 1, 5, 10 μM). Error bars are mean ± SD of biological duplicates.

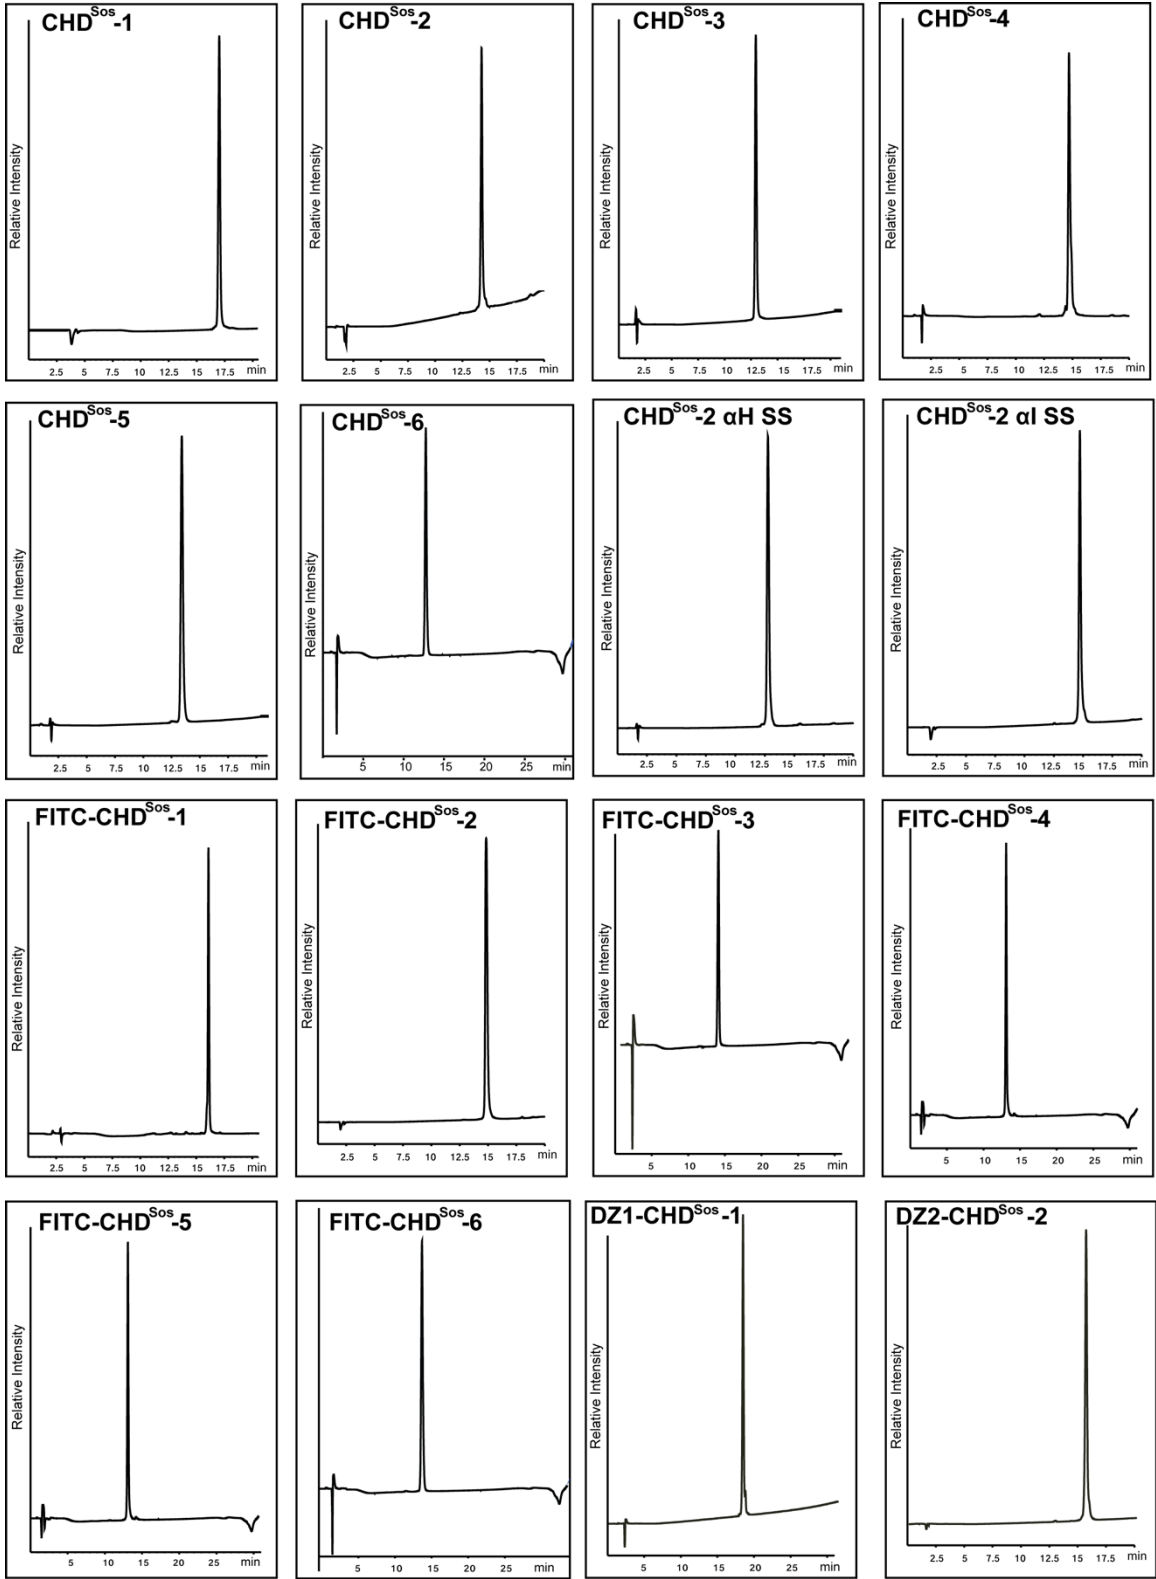

Figure S11. Analytical HPLC traces of purified linear and CHD peptides.

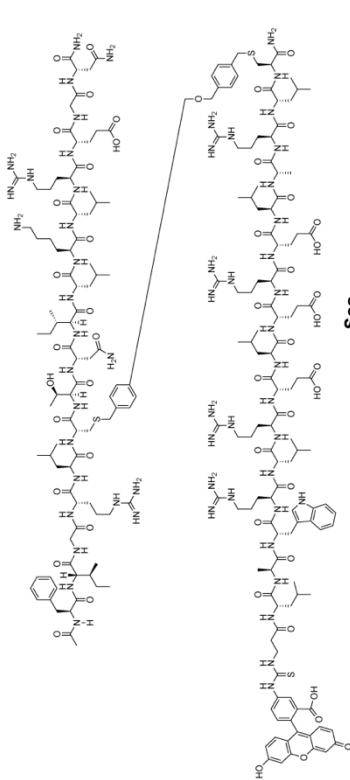

**FITC-CHD<sup>Sos-1</sup>**

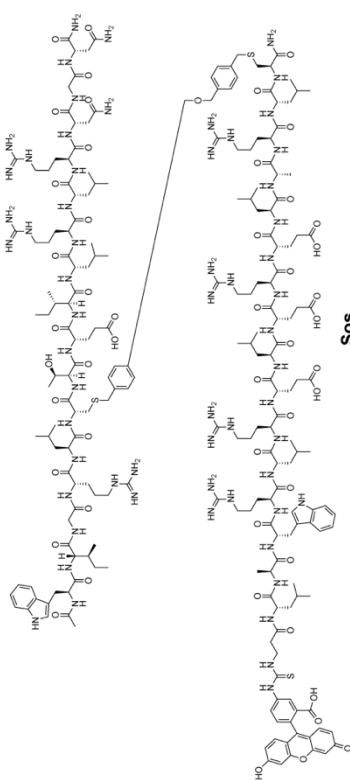

**FITC-CHD<sup>Sos-2</sup>**

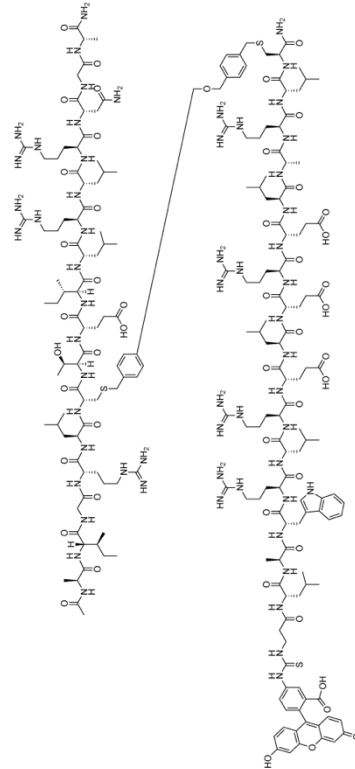

**FITC-CHD<sup>Sos-3</sup>**

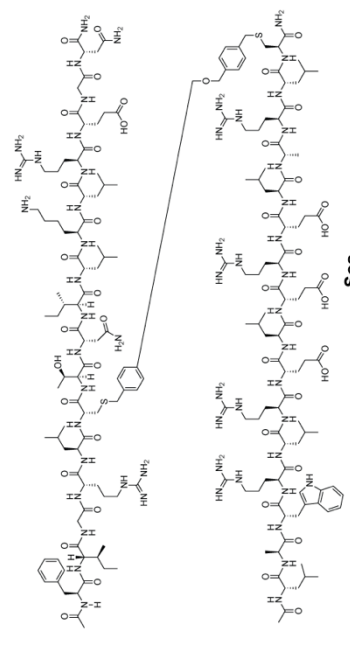

**CHD<sup>Sos-1</sup>**

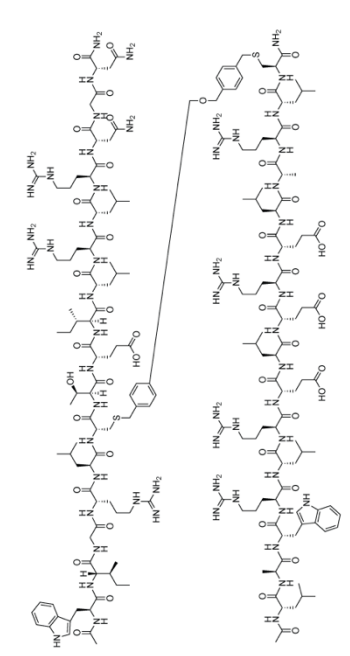

**CHD<sup>Sos-2</sup>**

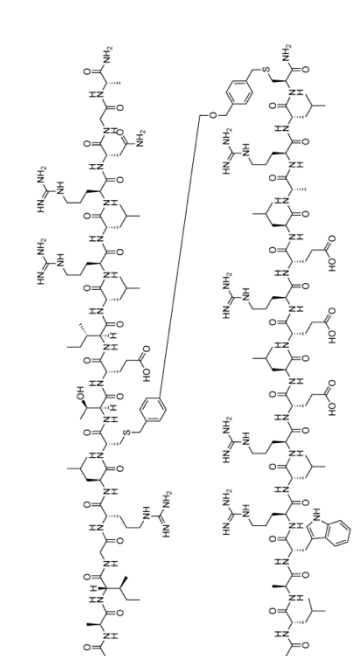

**CHD<sup>Sos-3</sup>**

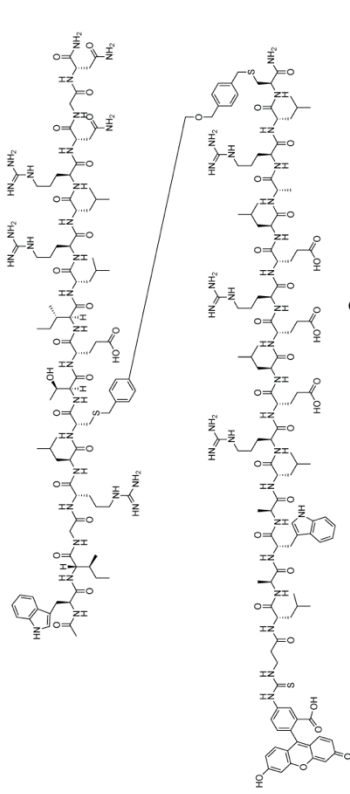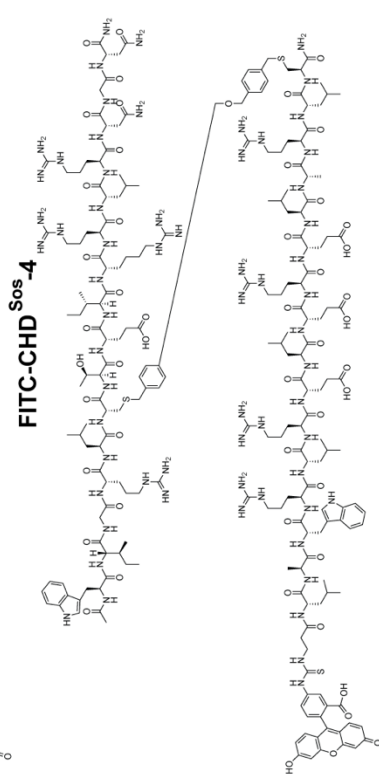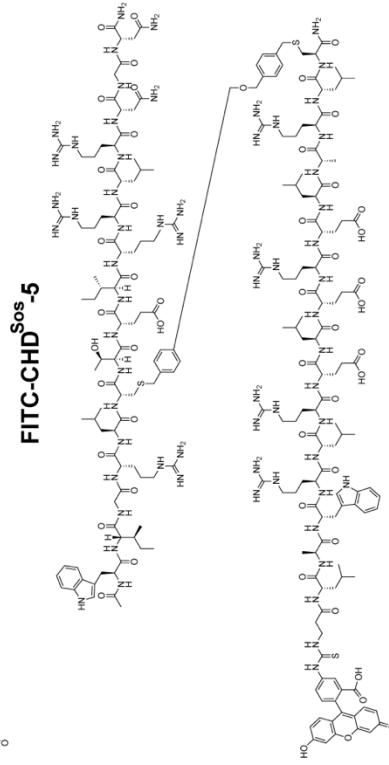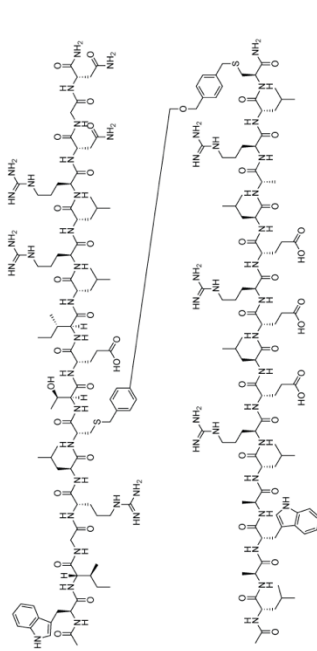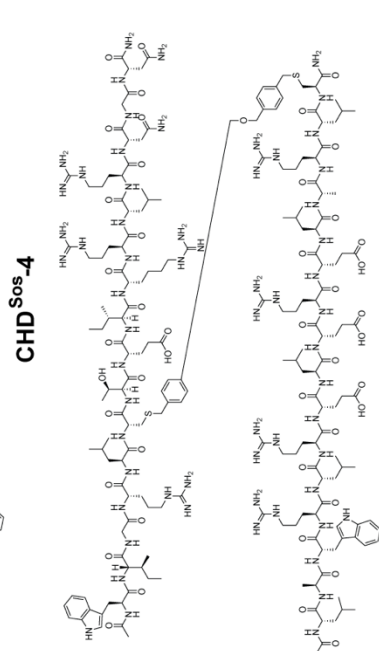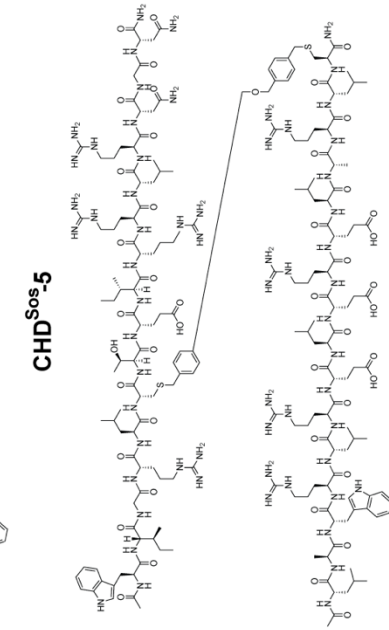

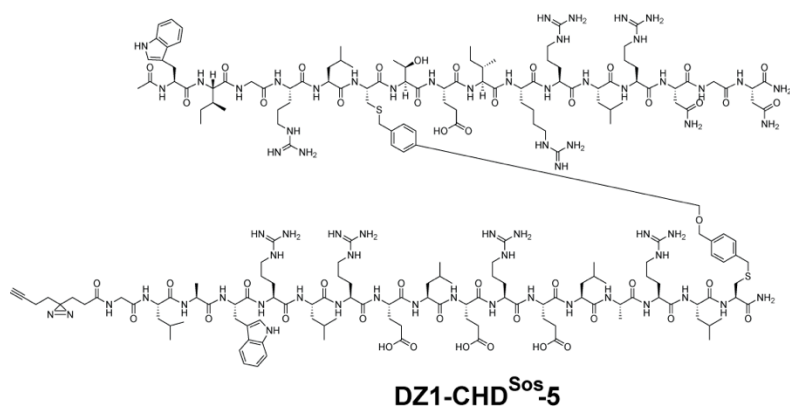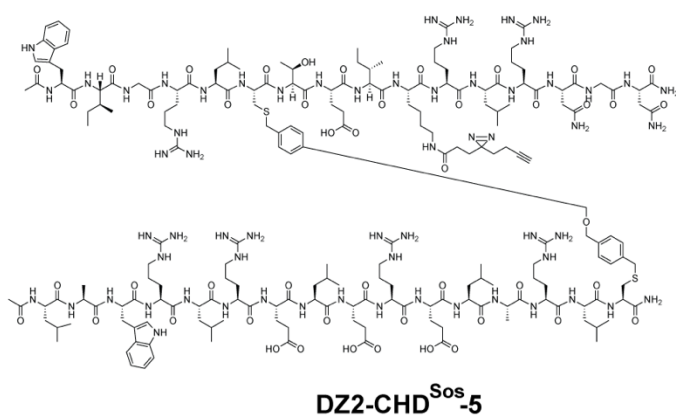

**Figure S12. Chemical structures of Sos CHDs.**

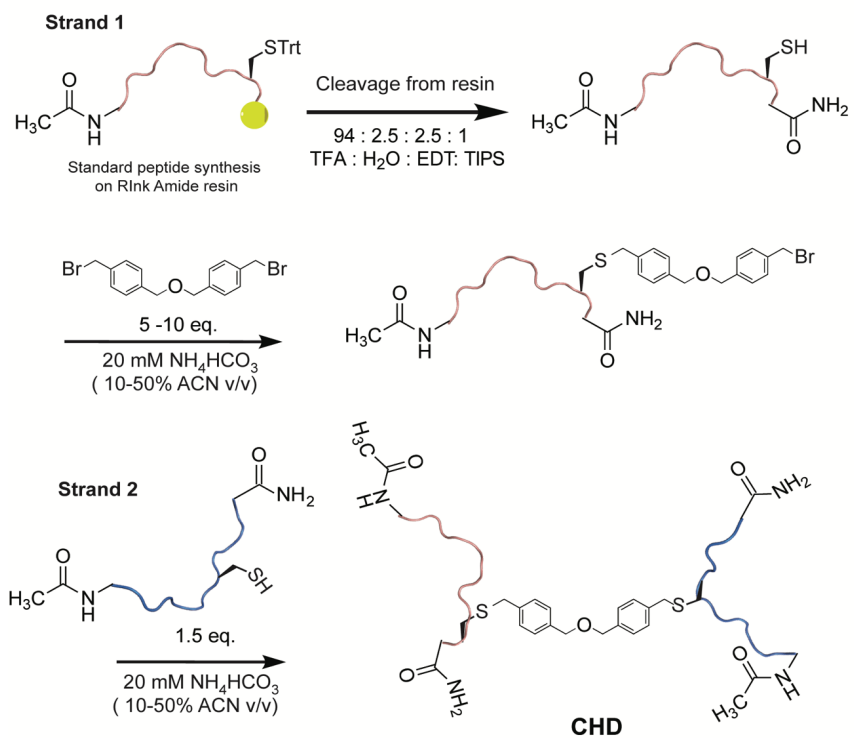

**Scheme S1. General synthetic scheme for CHD peptides.**



**Table S1.** Computational alanine scanning for determination of hot-spot residues in the Ras-Sos complex (PDB 1NVW and 1BKD).

**Sos  $\alpha$ H Helix (929-944):** FFGIYLTNILKTEEGN

| Sos Residue  | $\Delta\Delta G$ (kcal/mol)<br>from 1NVW | $\Delta\Delta G$ (kcal/mol)<br>from 1BKD |
|--------------|------------------------------------------|------------------------------------------|
| <b>F 929</b> | <b>1.64</b>                              | <b>1.45</b>                              |
| F 930        | 0.03                                     | 0.05                                     |
| <b>G 931</b> | --                                       | --                                       |
| I 932        | 0.07                                     | 0.05                                     |
| Y 933        | 0.01                                     | --                                       |
| L 934        | 0.65                                     | 0.65                                     |
| <b>T 935</b> | <b>1.11</b>                              | <b>1.59</b>                              |
| R 936        | 0.28                                     | 0.83                                     |
| I 937        | --                                       | --                                       |
| L 938        | 0.63                                     | 0.69                                     |
| K 939        | 0.27                                     | 0.44                                     |
| T 940        | -0.13                                    | 0.05                                     |
| E 941        | --                                       | --                                       |
| E 942        | <b>1.10</b>                              | 0.34                                     |
| G 943        | --                                       | --                                       |
| <b>N 944</b> | <b>2.35</b>                              | <b>2.63</b>                              |

**Table S2. Mass spectroscopic characterization of CHD peptides.** R<sup>H</sup> = L-homoarginine; A<sub>β</sub> = L-β-alanine; DZ = diazirine photocrosslinker; FITC is 5-fluorescein isothiocyanate linked via thiourea bond to N-terminal amine.

| Compound                        | Sos Domain* | Sequence                                             | Calculated [M+H] <sup>+</sup>  | Observed [M+H] <sup>+</sup> |
|---------------------------------|-------------|------------------------------------------------------|--------------------------------|-----------------------------|
| <b>CHD<sup>Sos-1</sup></b>      | Sos αH      | Ac-FIGRLCTEILKLREGN-NH <sub>2</sub>                  | 4180.8                         | 4180.8                      |
|                                 | Sos αI      | Ac-LAWRLRELERELARLC-NH <sub>2</sub>                  |                                |                             |
| <b>CHD<sup>Sos-2</sup></b>      | Sos αH      | Ac-WIGRLCTEILRLRNGN-NH <sub>2</sub>                  | 4248.1                         | 4247.0                      |
|                                 | Sos αI      | Ac-LAWRLRELERELARLC-NH <sub>2</sub>                  |                                |                             |
| <b>CHD<sup>Sos-3</sup></b>      | Sos αH      | Ac-AIGRLCTEILRLRNGA-NH <sub>2</sub>                  | 4089.9                         | 4087.9                      |
|                                 | Sos αI      | Ac-LAWRLRELERELARLC-NH <sub>2</sub>                  |                                |                             |
| <b>CHD<sup>Sos-4</sup></b>      | Sos αH      | Ac-WIGRLCTEILRLRNGN-NH <sub>2</sub>                  | 4162.0                         | 4162.0                      |
|                                 | Sos αI      | Ac-LAWALRELERELARLC-NH <sub>2</sub>                  |                                |                             |
| <b>CHD<sup>Sos-5</sup></b>      | Sos αH      | Ac-WIGRLCTEIR <sup>H</sup> RLRNGN-NH <sub>2</sub>    | 4305.1                         | 4304.0                      |
|                                 | Sos αI      | Ac-LAWRLRELERELARLC-NH <sub>2</sub>                  |                                |                             |
| <b>CHD<sup>Sos-6</sup></b>      | Sos αH      | Ac-WIGRLCTEIRRLRNGN-NH <sub>2</sub>                  | 4291.1                         | 4289.5                      |
|                                 | Sos αI      | Ac-LAWRLRELERELARLC-NH <sub>2</sub>                  |                                |                             |
| <b>CHD<sup>Sos-2</sup> αH</b>   | Sos αH      | Ac-WIGRLCTEILRLRNGN-NH <sub>2</sub>                  | 1957.3                         | 1957.4                      |
| <b>CHD<sup>Sos-2</sup> αI</b>   | Sos αI      | Ac-LAWRLRELERELARLC-NH <sub>2</sub>                  | 2069.5                         | 2069.4                      |
| <b>FITC-CHD<sup>Sos-1</sup></b> | Sos αH      | Ac-FIGRLCTEILKLREGN-NH <sub>2</sub>                  | 4599.2                         | 4599.0                      |
|                                 | Sos αI      | FITC-A <sub>β</sub> LAWRLRELERELARLC-NH <sub>2</sub> |                                |                             |
| <b>FITC-CHD<sup>Sos-2</sup></b> | Sos αH      | Ac-WIGRLCTEILRLRNGN-NH <sub>2</sub>                  | 4666.5                         | 4665.5                      |
|                                 | Sos αI      | FITC-A <sub>β</sub> LAWRLRELERELARLC-NH <sub>2</sub> |                                |                             |
| <b>FITC-CHD<sup>Sos-3</sup></b> | Sos αH      | Ac-AIGRLCTEILRLRNGA-NH <sub>2</sub>                  | 4508.3                         | 4508.0                      |
|                                 | Sos αI      | FITC-A <sub>β</sub> LAWRLRELERELARLC-NH <sub>2</sub> |                                |                             |
| <b>FITC-CHD<sup>Sos-4</sup></b> | Sos αH      | Ac-WIGRLCTEILRLRNGN-NH <sub>2</sub>                  | 4580.4                         | 4580.1                      |
|                                 | Sos αI      | FITC-A <sub>β</sub> LAWALRELERELARLC-NH <sub>2</sub> |                                |                             |
| <b>FITC-CHD<sup>Sos-5</sup></b> | Sos αH      | Ac-WIGRLCTEIR <sup>H</sup> RLRNGN-NH <sub>2</sub>    | 4723.6                         | 4722.3                      |
|                                 | Sos αI      | FITC-A <sub>β</sub> LAWRLRELERELARLC-NH <sub>2</sub> |                                |                             |
| <b>FITC-CHD<sup>Sos-6</sup></b> | Sos αH      | Ac-WIGRLCTEIRRLRNGN-NH <sub>2</sub>                  | 4710.6                         | 4710.9                      |
|                                 | Sos αI      | FITC-A <sub>β</sub> LAWRLRELERELARLC-NH <sub>2</sub> |                                |                             |
| <b>DZ1-CHD<sup>Sos-5</sup></b>  | Sos αH      | Ac-WIGRLCTEIR <sup>H</sup> RLRNGN-NH <sub>2</sub>    | 1117.5<br>[M+4H] <sup>4+</sup> | 1117.6                      |
|                                 | Sos αI      | DZ-GLAWRLRELERELARLC-NH <sub>2</sub>                 |                                |                             |
| <b>DZ2-CHD<sup>Sos-5</sup></b>  | Sos αH      | Ac-WIGRLCTEIK(DZ)RLRNGN-NH <sub>2</sub>              | 1103.3<br>[M+4H] <sup>4+</sup> | 1102.3                      |
|                                 | Sos αI      | Ac-LAWRLRELERELARLC-NH <sub>2</sub>                  |                                |                             |

\*Mimic of Sos αH or αI sequence with designed changes

**Table S3.** Enriched proteins from MS-based proteomics using photoaffinity crosslinking of **DZ2-CHD<sup>Sos</sup>-5** in H358 cells.

| Accession | # Peptides | # Unique Peptides | Gene Symbol | Average Abundance         |                     | Fold  | p-value | log <sub>2</sub> (fold) | -log <sub>10</sub> (p) |
|-----------|------------|-------------------|-------------|---------------------------|---------------------|-------|---------|-------------------------|------------------------|
|           |            |                   |             | DZ2-CHD <sup>Sos</sup> -5 | CP-266 <sup>a</sup> |       |         |                         |                        |
| P62826    | 11         | 11                | RAN         | 7714                      | 964                 | 8.00  | 2.0E-08 | 3.00                    | 7.69                   |
| P19623    | 7          | 7                 | SRM         | 1300                      | 143                 | 9.12  | 1.2E-07 | 3.19                    | 6.92                   |
| P21964    | 7          | 7                 | COMT        | 1550                      | 210                 | 7.37  | 1.4E-07 | 2.88                    | 6.85                   |
| P50914    | 6          | 6                 | RPL14       | 1804                      | 284                 | 6.36  | 1.8E-07 | 2.67                    | 6.75                   |
| Q99497    | 3          | 3                 | PARK7       | 1518                      | 305                 | 4.98  | 1.9E-07 | 2.32                    | 6.71                   |
| Q02543    | 7          | 7                 | RPL18A      | 6677                      | 1077                | 6.20  | 2.0E-07 | 2.63                    | 6.70                   |
| P51153    | 5          | 3                 | RAB13       | 198                       | 27                  | 7.35  | 2.0E-07 | 2.88                    | 6.70                   |
| O75821    | 9          | 9                 | EIF3G       | 2111                      | 276                 | 7.64  | 2.2E-07 | 2.93                    | 6.65                   |
| P62424    | 15         | 15                | RPL7A       | 5704                      | 886                 | 6.44  | 2.4E-07 | 2.69                    | 6.62                   |
| Q9GZZ1    | 7          | 7                 | NAA50       | 1429                      | 201                 | 7.11  | 2.6E-07 | 2.83                    | 6.58                   |
| Q9H7E9    | 3          | 3                 | C8orf33     | 541                       | 64                  | 8.46  | 2.7E-07 | 3.08                    | 6.57                   |
| P39019    | 11         | 11                | RPS19       | 9543                      | 855                 | 11.17 | 3.0E-07 | 3.48                    | 6.53                   |
| Q9BYD2    | 6          | 6                 | MRPL9       | 895                       | 140                 | 6.40  | 3.0E-07 | 2.68                    | 6.52                   |
| Q9Y6C9    | 5          | 5                 | MTCH2       | 1152                      | 202                 | 5.70  | 3.4E-07 | 2.51                    | 6.46                   |
| Q99816    | 9          | 9                 | TSG101      | 1485                      | 174                 | 8.53  | 4.4E-07 | 3.09                    | 6.36                   |
| Q12765    | 5          | 5                 | SCRN1       | 625                       | 75                  | 8.29  | 5.0E-07 | 3.05                    | 6.30                   |
| Q15185    | 8          | 8                 | PTGES3      | 2760                      | 228                 | 12.08 | 5.5E-07 | 3.59                    | 6.26                   |
| P22087    | 10         | 10                | FBL         | 3540                      | 697                 | 5.08  | 6.1E-07 | 2.34                    | 6.21                   |
| P68104    | 25         | 13                | EEF1A1      | 33254                     | 3786                | 8.78  | 6.8E-07 | 3.13                    | 6.17                   |
| O75608    | 5          | 5                 | LYPLA1      | 1898                      | 368                 | 5.16  | 7.1E-07 | 2.37                    | 6.15                   |
| Q9H0S4    | 9          | 9                 | DDX47       | 1727                      | 254                 | 6.81  | 7.9E-07 | 2.77                    | 6.10                   |
| P61026    | 13         | 10                | RAB10       | 7046                      | 1160                | 6.08  | 8.6E-07 | 2.60                    | 6.07                   |
| P61106    | 14         | 13                | RAB14       | 7072                      | 1053                | 6.72  | 9.2E-07 | 2.75                    | 6.04                   |
| O95470    | 11         | 11                | SGPL1       | 717                       | 122                 | 5.87  | 9.2E-07 | 2.55                    | 6.04                   |
| Q5BKZ1    | 3          | 3                 | ZNF326      | 89                        | 14                  | 6.21  | 1.3E-06 | 2.64                    | 5.89                   |
| Q15691    | 15         | 15                | MAPRE1      | 2720                      | 360                 | 7.55  | 1.3E-06 | 2.92                    | 5.89                   |
| Q9BWF3    | 12         | 12                | RBM4        | 2761                      | 355                 | 7.78  | 1.4E-06 | 2.96                    | 5.86                   |
| Q08174    | 6          | 6                 | PCDH1       | 1258                      | 157                 | 8.00  | 1.4E-06 | 3.00                    | 5.86                   |
| Q9BRU9    | 3          | 3                 | UTP23       | 631                       | 141                 | 4.47  | 1.4E-06 | 2.16                    | 5.84                   |
| P62906    | 9          | 9                 | RPL10A      | 12200                     | 1574                | 7.75  | 1.6E-06 | 2.95                    | 5.79                   |
| Q15050    | 6          | 6                 | RRS1        | 1090                      | 222                 | 4.91  | 1.9E-06 | 2.30                    | 5.71                   |
| P06493    | 8          | 8                 | CDK1        | 2291                      | 269                 | 8.52  | 2.1E-06 | 3.09                    | 5.68                   |
| Q9Y3B7    | 6          | 6                 | MRPL11      | 2437                      | 312                 | 7.81  | 2.4E-06 | 2.97                    | 5.62                   |
| Q14684    | 3          | 3                 | RRP1B       | 778                       | 167                 | 4.67  | 2.4E-06 | 2.22                    | 5.61                   |
| P23497    | 5          | 4                 | SP100       | 453                       | 78                  | 5.81  | 2.7E-06 | 2.54                    | 5.56                   |
| P38919    | 22         | 19                | EIF4A3      | 6326                      | 1033                | 6.13  | 2.9E-06 | 2.61                    | 5.54                   |
| Q9NP72    | 6          | 6                 | RAB18       | 1628                      | 271                 | 6.01  | 3.3E-06 | 2.59                    | 5.48                   |
| Q9BQA1    | 3          | 3                 | WDR77       | 67                        | 13                  | 5.35  | 3.7E-06 | 2.42                    | 5.44                   |
| P62854    | 3          | 3                 | RPS26       | 743                       | 106                 | 6.98  | 3.8E-06 | 2.80                    | 5.42                   |
| Q8TDB6    | 3          | 3                 | DTX3L       | 151                       | 47                  | 3.19  | 4.2E-06 | 1.67                    | 5.38                   |
| Q96A08    | 7          | 3                 | HIST1H2BA   | 1514                      | 390                 | 3.89  | 5.0E-06 | 1.96                    | 5.30                   |
| P39023    | 26         | 26                | RPL3        | 13403                     | 1468                | 9.13  | 7.7E-06 | 3.19                    | 5.11                   |
| P47755    | 8          | 5                 | CAPZA2      | 521                       | 74                  | 7.09  | 8.3E-06 | 2.83                    | 5.08                   |
| P36404    | 5          | 5                 | ARL2        | 665                       | 75                  | 8.87  | 9.0E-06 | 3.15                    | 5.05                   |
| P52597    | 10         | 8                 | HNRNPF      | 2729                      | 425                 | 6.42  | 9.9E-06 | 2.68                    | 5.01                   |
| P05787    | 45         | 37                | KRT8        | 59794                     | 13117               | 4.56  | 9.9E-06 | 2.19                    | 5.01                   |
| P22392-2  | 13         | 5                 | NME2        | 5458                      | 1020                | 5.35  | 1.0E-05 | 2.42                    | 4.99                   |
| P52815    | 4          | 4                 | MRPL12      | 156                       | 35                  | 4.47  | 1.1E-05 | 2.16                    | 4.95                   |
| P18124    | 17         | 17                | RPL7        | 9362                      | 1364                | 6.87  | 1.1E-05 | 2.78                    | 4.94                   |
| P27707    | 3          | 3                 | DCK         | 333                       | 51                  | 6.51  | 1.2E-05 | 2.70                    | 4.93                   |
| Q9H8Y8    | 4          | 4                 | GORASP2     | 202                       | 46                  | 4.34  | 1.4E-05 | 2.12                    | 4.86                   |
| Q9Y496    | 6          | 6                 | KIF3A       | 399                       | 73                  | 5.48  | 1.5E-05 | 2.46                    | 4.82                   |
| Q9NTK5    | 9          | 9                 | OLA1        | 1492                      | 253                 | 5.90  | 2.6E-05 | 2.56                    | 4.59                   |
| Q8WYA6    | 12         | 12                | CTNBL1      | 2201                      | 322                 | 6.83  | 2.6E-05 | 2.77                    | 4.58                   |
| P09493-3  | 16         | 5                 | TPM1        | 2215                      | 527                 | 4.20  | 3.0E-05 | 2.07                    | 4.52                   |
| P60660    | 6          | 6                 | MYL6        | 2017                      | 395                 | 5.10  | 3.3E-05 | 2.35                    | 4.49                   |
| Q5JWF2    | 5          | 4                 | GNAS        | 104                       | 19                  | 5.62  | 3.3E-05 | 2.49                    | 4.48                   |
| Q9GZZ9    | 3          | 3                 | UBA5        | 413                       | 51                  | 8.06  | 3.4E-05 | 3.01                    | 4.47                   |
| P09211    | 8          | 8                 | GSTP1       | 4548                      | 947                 | 4.80  | 5.1E-05 | 2.26                    | 4.29                   |
| Q96FQ6    | 4          | 4                 | S100A16     | 2466                      | 426                 | 5.79  | 6.1E-05 | 2.53                    | 4.21                   |

|          |    |    |          |       |      |       |         |      |      |
|----------|----|----|----------|-------|------|-------|---------|------|------|
| Q9H7Z7   | 14 | 14 | PTGES2   | 4174  | 521  | 8.01  | 6.6E-05 | 3.00 | 4.18 |
| P17931   | 6  | 6  | LGALS3   | 2583  | 517  | 4.99  | 6.7E-05 | 2.32 | 4.17 |
| O00299   | 8  | 8  | CLIC1    | 3016  | 340  | 8.88  | 6.8E-05 | 3.15 | 4.16 |
| O60506-3 | 28 | 23 | SYNCRIP  | 16364 | 2845 | 5.75  | 7.3E-05 | 2.52 | 4.14 |
| Q13243   | 5  | 4  | SRSF5    | 553   | 145  | 3.81  | 8.0E-05 | 1.93 | 4.10 |
| Q8TDD1   | 9  | 9  | DDX54    | 1424  | 405  | 3.52  | 8.9E-05 | 1.81 | 4.05 |
| Q9BTY7   | 4  | 4  | HGH1     | 506   | 93   | 5.45  | 9.5E-05 | 2.45 | 4.02 |
| P27144   | 5  | 5  | AK4      | 1250  | 154  | 8.11  | 1.1E-04 | 3.02 | 3.97 |
| P54819   | 6  | 6  | AK2      | 1082  | 335  | 3.23  | 1.1E-04 | 1.69 | 3.94 |
| P45973   | 6  | 6  | CBX5     | 4248  | 832  | 5.11  | 1.2E-04 | 2.35 | 3.92 |
| Q9UNX4   | 5  | 5  | WDR3     | 235   | 72   | 3.24  | 1.3E-04 | 1.69 | 3.88 |
| Q5T6V5   | 5  | 5  | C9orf64  | 420   | 55   | 7.71  | 1.5E-04 | 2.95 | 3.83 |
| Q07666   | 12 | 12 | KHDRBS1  | 9696  | 1587 | 6.11  | 1.7E-04 | 2.61 | 3.76 |
| Q15785   | 9  | 9  | TOMM34   | 1723  | 156  | 11.08 | 2.4E-04 | 3.47 | 3.61 |
| Q9BVP2   | 12 | 12 | GNL3     | 2113  | 441  | 4.80  | 2.7E-04 | 2.26 | 3.57 |
| Q9BVI4   | 5  | 5  | NOC4L    | 366   | 73   | 5.03  | 2.9E-04 | 2.33 | 3.54 |
| Q9BQ67   | 5  | 5  | GRWD1    | 1045  | 311  | 3.36  | 3.0E-04 | 1.75 | 3.52 |
| Q9Y2X3   | 10 | 10 | NOP58    | 2414  | 869  | 2.78  | 3.1E-04 | 1.47 | 3.51 |
| P56182   | 7  | 7  | RRP1     | 680   | 174  | 3.91  | 3.2E-04 | 1.97 | 3.50 |
| O60841   | 10 | 10 | EIF5B    | 689   | 158  | 4.37  | 3.2E-04 | 2.13 | 3.49 |
| P54619   | 9  | 9  | PRKAG1   | 3113  | 336  | 9.27  | 3.5E-04 | 3.21 | 3.45 |
| Q8WUA2   | 3  | 3  | PPIL4    | 189   | 33   | 5.66  | 3.5E-04 | 2.50 | 3.45 |
| P01116-2 | 6  | 6  | KRAS     | 825   | 124  | 6.63  | 3.7E-04 | 2.73 | 3.43 |
| Q9BRK5   | 6  | 6  | SDF4     | 633   | 90   | 7.02  | 3.9E-04 | 2.81 | 3.41 |
| Q9Y3D6   | 3  | 3  | FIS1     | 357   | 126  | 2.84  | 4.2E-04 | 1.51 | 3.37 |
| P31146   | 5  | 4  | CORO1A   | 523   | 117  | 4.47  | 5.6E-04 | 2.16 | 3.25 |
| P62280   | 9  | 9  | RPS11    | 6290  | 579  | 10.86 | 5.6E-04 | 3.44 | 3.25 |
| Q15070   | 4  | 4  | OXA1L    | 186   | 37   | 5.08  | 5.6E-04 | 2.34 | 3.25 |
| Q8IY81   | 15 | 15 | FTSJ3    | 2367  | 788  | 3.01  | 5.7E-04 | 1.59 | 3.24 |
| Q08257   | 4  | 4  | CRYZ     | 254   | 70   | 3.61  | 5.7E-04 | 1.85 | 3.24 |
| Q14137   | 6  | 6  | BOP1     | 631   | 163  | 3.87  | 5.8E-04 | 1.95 | 3.23 |
| Q9NVP1   | 16 | 16 | DDX18    | 2793  | 821  | 3.40  | 6.2E-04 | 1.77 | 3.21 |
| O96008   | 8  | 8  | TOMM40   | 3359  | 735  | 4.57  | 6.3E-04 | 2.19 | 3.20 |
| Q86SX6   | 3  | 3  | GLRX5    | 357   | 85   | 4.21  | 6.3E-04 | 2.07 | 3.20 |
| P46777   | 11 | 11 | RPL5     | 6090  | 837  | 7.27  | 6.6E-04 | 2.86 | 3.18 |
| P35080-2 | 4  | 3  | PFN2     | 1570  | 232  | 6.76  | 7.1E-04 | 2.76 | 3.15 |
| Q10713   | 4  | 4  | PMPCA    | 395   | 100  | 3.94  | 7.3E-04 | 1.98 | 3.14 |
| P62851   | 5  | 5  | RPS25    | 5841  | 577  | 10.13 | 7.8E-04 | 3.34 | 3.11 |
| P06753-2 | 24 | 12 | TPM3     | 16084 | 3226 | 4.99  | 8.4E-04 | 2.32 | 3.08 |
| Q8WU90   | 9  | 9  | ZC3H15   | 270   | 39   | 6.94  | 9.6E-04 | 2.79 | 3.02 |
| Q8NEJ9   | 3  | 3  | NGDN     | 251   | 45   | 5.53  | 1.1E-03 | 2.47 | 2.96 |
| Q99614   | 6  | 6  | TTC1     | 1189  | 183  | 6.51  | 1.1E-03 | 2.70 | 2.94 |
| P28066   | 6  | 6  | PSMA5    | 2172  | 340  | 6.39  | 1.2E-03 | 2.68 | 2.94 |
| P30419   | 4  | 4  | NMT1     | 480   | 165  | 2.90  | 1.4E-03 | 1.54 | 2.86 |
| Q13206   | 3  | 3  | DDX10    | 87    | 19   | 4.64  | 1.4E-03 | 2.22 | 2.84 |
| P05783   | 31 | 30 | KRT18    | 34924 | 9662 | 3.61  | 1.5E-03 | 1.85 | 2.83 |
| P31943   | 14 | 8  | HNRNPH1  | 11191 | 1588 | 7.05  | 1.5E-03 | 2.82 | 2.82 |
| O75844   | 4  | 4  | ZMPSTE24 | 1308  | 482  | 2.71  | 1.6E-03 | 1.44 | 2.80 |
| P27635   | 10 | 10 | RPL10    | 8043  | 984  | 8.18  | 1.7E-03 | 3.03 | 2.78 |
| P62258   | 22 | 20 | YWHAE    | 16731 | 1848 | 9.05  | 1.7E-03 | 3.18 | 2.76 |
| Q9BUQ8   | 5  | 5  | DDX23    | 207   | 68   | 3.05  | 1.8E-03 | 1.61 | 2.75 |
| P60842   | 25 | 13 | EIF4A1   | 13939 | 1642 | 8.49  | 1.8E-03 | 3.09 | 2.74 |
| Q9H074   | 3  | 3  | PAIP1    | 276   | 45   | 6.18  | 1.8E-03 | 2.63 | 2.74 |
| P61981   | 10 | 6  | YWHAG    | 2231  | 261  | 8.53  | 2.0E-03 | 3.09 | 2.70 |
| P63241   | 10 | 10 | EIF5A    | 5906  | 792  | 7.46  | 2.0E-03 | 2.90 | 2.69 |
| Q13247   | 6  | 5  | SRSF6    | 2200  | 666  | 3.30  | 2.0E-03 | 1.72 | 2.69 |
| Q9H3Q1   | 4  | 4  | CDC42EP4 | 535   | 48   | 11.13 | 2.1E-03 | 3.48 | 2.68 |
| P27348   | 14 | 9  | YWHAQ    | 5706  | 648  | 8.81  | 2.1E-03 | 3.14 | 2.68 |
| P82930   | 3  | 3  | MRPS34   | 717   | 101  | 7.08  | 2.2E-03 | 2.82 | 2.67 |
| Q14498   | 6  | 6  | RBM39    | 1230  | 425  | 2.90  | 2.2E-03 | 1.53 | 2.66 |
| O76021   | 20 | 20 | RSL1D1   | 5114  | 1655 | 3.09  | 2.3E-03 | 1.63 | 2.64 |
| O95758-1 | 8  | 5  | PTBP3    | 333   | 55   | 6.06  | 2.5E-03 | 2.60 | 2.61 |
| Q6P1J9   | 3  | 3  | CDC73    | 251   | 58   | 4.34  | 2.5E-03 | 2.12 | 2.60 |
| Q53GQ0   | 10 | 10 | HSD17B12 | 3717  | 495  | 7.51  | 2.6E-03 | 2.91 | 2.59 |
| Q9HAV4   | 4  | 4  | XPO5     | 197   | 49   | 3.98  | 2.8E-03 | 1.99 | 2.55 |
| Q96S44   | 4  | 4  | TP53RK   | 596   | 52   | 11.54 | 3.0E-03 | 3.53 | 2.53 |
| P0DP25   | 5  | 5  | CALM3    | 1088  | 211  | 5.16  | 3.2E-03 | 2.37 | 2.50 |
| Q9ULX3   | 3  | 3  | NOB1     | 233   | 23   | 9.99  | 3.2E-03 | 3.32 | 2.49 |

|        |    |    |         |       |      |       |         |      |      |
|--------|----|----|---------|-------|------|-------|---------|------|------|
| P19338 | 42 | 42 | NCL     | 21643 | 8238 | 2.63  | 3.3E-03 | 1.39 | 2.49 |
| P78318 | 6  | 6  | IGBP1   | 660   | 74   | 8.91  | 3.3E-03 | 3.16 | 2.48 |
| Q05639 | 22 | 10 | EEF1A2  | 4035  | 438  | 9.22  | 3.3E-03 | 3.20 | 2.48 |
| P24534 | 9  | 7  | EEF1B2  | 6809  | 646  | 10.55 | 3.4E-03 | 3.40 | 2.47 |
| P19784 | 7  | 7  | CSNK2A2 | 812   | 112  | 7.25  | 3.5E-03 | 2.86 | 2.46 |
| Q9ULC4 | 4  | 4  | MCTS1   | 484   | 82   | 5.88  | 3.5E-03 | 2.56 | 2.45 |
| Q96A49 | 11 | 11 | SYAP1   | 966   | 109  | 8.88  | 3.7E-03 | 3.15 | 2.43 |
| Q99439 | 6  | 4  | CNN2    | 791   | 186  | 4.24  | 3.8E-03 | 2.09 | 2.42 |
| Q15628 | 4  | 4  | TRADD   | 74    | 17   | 4.34  | 4.0E-03 | 2.12 | 2.39 |
| O60547 | 5  | 5  | GMDS    | 261   | 32   | 8.12  | 4.1E-03 | 3.02 | 2.38 |
| P04632 | 6  | 6  | CAPNS1  | 555   | 87   | 6.35  | 4.2E-03 | 2.67 | 2.37 |
| P40939 | 22 | 22 | HADHA   | 4549  | 1190 | 3.82  | 4.5E-03 | 1.94 | 2.35 |
| Q9BYG3 | 5  | 5  | NIFK    | 1813  | 344  | 5.27  | 4.8E-03 | 2.40 | 2.32 |
| Q01081 | 4  | 4  | U2AF1   | 396   | 85   | 4.66  | 4.8E-03 | 2.22 | 2.32 |
| P49720 | 3  | 3  | PSMB3   | 422   | 159  | 2.66  | 5.2E-03 | 1.41 | 2.28 |
| Q9BUF5 | 18 | 8  | TUBB6   | 2620  | 284  | 9.22  | 5.2E-03 | 3.21 | 2.28 |
| P61224 | 3  | 3  | RAP1B   | 1520  | 227  | 6.69  | 5.6E-03 | 2.74 | 2.25 |
| P35659 | 11 | 11 | DEK     | 2440  | 785  | 3.11  | 5.7E-03 | 1.64 | 2.25 |
| P20042 | 12 | 12 | EIF2S2  | 5270  | 893  | 5.90  | 5.8E-03 | 2.56 | 2.24 |
| Q99747 | 6  | 6  | NAPG    | 98    | 18   | 5.47  | 6.2E-03 | 2.45 | 2.20 |
| P35222 | 17 | 15 | CTNNB1  | 4435  | 1217 | 3.64  | 6.4E-03 | 1.87 | 2.20 |
| Q96FW1 | 7  | 7  | OTUB1   | 3921  | 446  | 8.79  | 6.5E-03 | 3.14 | 2.18 |
| Q01105 | 12 | 3  | SET     | 5660  | 1233 | 4.59  | 6.6E-03 | 2.20 | 2.18 |
| P55795 | 10 | 5  | HNRNPH2 | 1682  | 230  | 7.30  | 6.6E-03 | 2.87 | 2.18 |
| P51148 | 8  | 6  | RAB5C   | 2640  | 450  | 5.87  | 6.7E-03 | 2.55 | 2.17 |
| P61081 | 6  | 6  | UBE2M   | 1401  | 229  | 6.13  | 6.7E-03 | 2.62 | 2.17 |
| Q9P2K5 | 4  | 4  | MYEF2   | 262   | 44   | 5.98  | 6.8E-03 | 2.58 | 2.17 |
| Q99829 | 3  | 3  | CPNE1   | 215   | 35   | 6.17  | 6.9E-03 | 2.62 | 2.16 |
| Q9P287 | 4  | 4  | BCCIP   | 693   | 94   | 7.38  | 6.9E-03 | 2.88 | 2.16 |
| Q92733 | 5  | 5  | PRCC    | 893   | 160  | 5.59  | 7.0E-03 | 2.48 | 2.15 |
| Q9BX10 | 3  | 3  | GTPBP2  | 91    | 11   | 8.15  | 7.1E-03 | 3.03 | 2.15 |
| P50402 | 10 | 10 | EMD     | 3191  | 480  | 6.64  | 7.2E-03 | 2.73 | 2.14 |
| O14773 | 3  | 3  | TPP1    | 113   | 32   | 3.49  | 7.4E-03 | 1.80 | 2.13 |
| Q99627 | 4  | 4  | COPS8   | 1199  | 190  | 6.31  | 7.6E-03 | 2.66 | 2.12 |
| P39687 | 9  | 4  | ANP32A  | 2059  | 284  | 7.26  | 7.9E-03 | 2.86 | 2.10 |
| P09651 | 18 | 13 | HNRNPA1 | 10688 | 2198 | 4.86  | 8.0E-03 | 2.28 | 2.10 |
| P30484 | 7  | 4  | HLA-B   | 415   | 86   | 4.85  | 8.3E-03 | 2.28 | 2.08 |
| P63104 | 18 | 13 | YWHAZ   | 16707 | 1983 | 8.42  | 8.4E-03 | 3.07 | 2.07 |
| O43390 | 27 | 22 | HNRNPR  | 10264 | 1745 | 5.88  | 8.6E-03 | 2.56 | 2.07 |
| P29692 | 10 | 8  | EEF1D   | 6725  | 614  | 10.95 | 9.0E-03 | 3.45 | 2.04 |
| Q9P289 | 9  | 5  | STK26   | 1337  | 170  | 7.87  | 9.3E-03 | 2.98 | 2.03 |
| P60510 | 3  | 3  | PPP4C   | 377   | 60   | 6.27  | 9.8E-03 | 2.65 | 2.01 |
| Q15126 | 8  | 8  | PMVK    | 1594  | 177  | 9.02  | 9.9E-03 | 3.17 | 2.00 |
| O95433 | 12 | 12 | AHSA1   | 1074  | 157  | 6.84  | 9.9E-03 | 2.77 | 2.00 |

<sup>a</sup>CP-266 = 3-(3-(but-3-yn-1-yl)-3H-diazirin-3-yl)-N-methylpropanamide

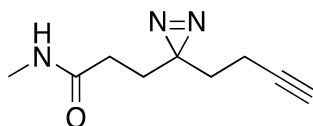

**Table S4A.** Analysis of sequence similarity within enriched Ras GTPase proteins as compared to K-Ras.

| Accession | Gene Symbol | G-Domain<br>(Residues 1-166) |              | Switch I + Binding Helix<br>(Residues 10-40) |              | Switch II<br>(Residues 56-75) |              |
|-----------|-------------|------------------------------|--------------|----------------------------------------------|--------------|-------------------------------|--------------|
|           |             | % Identity                   | % Similarity | % Identity                                   | % Similarity | % Identity                    | % Similarity |
| P01116-2  | KRAS        | -                            | -            | -                                            | -            | -                             | -            |
| P62826    | RAN         | 25.9                         | 68.1         | 25.8                                         | 67.7         | 45                            | 75           |
| P51153    | RAB13       | 38.0                         | 75.3         | 35.5                                         | 71.0         | 40                            | 70           |
| P61026    | RAB10       | 35.5                         | 73.5         | 25.8                                         | 64.5         | 40                            | 70           |
| P61106    | RAB14       | 31.3                         | 69.9         | 35.5                                         | 64.5         | 45                            | 70           |
| Q9NP72    | RAB18       | 33.7                         | 71.1         | 35.5                                         | 64.5         | 40                            | 70           |
| P61224    | RAP1B       | 57.2                         | 88.0         | 74.2                                         | 96.8         | 65                            | 90           |
| P51148    | RAB5C       | 31.9                         | 72.9         | 29.0                                         | 77.4         | 45                            | 65           |
| P01112    | HRAS        | 94.0                         | 98.8         | 100                                          | 100          | 100                           | 100          |
| P01111    | NRAS        | 94.0                         | 98.2         | 100                                          | 100          | 100                           | 100          |

**Table S4B.** Analysis of sequence similarity within enriched non-Ras G-proteins as compared to K-Ras.

| Accession | Gene Symbol | G-Domain<br>(Residues 1-166) |              | Switch I + Binding Helix<br>(Residues 10-40) |              | Switch II<br>(Residues 56-75) |              |
|-----------|-------------|------------------------------|--------------|----------------------------------------------|--------------|-------------------------------|--------------|
|           |             | % Identity                   | % Similarity | % Identity                                   | % Similarity | % Identity                    | % Similarity |
| P01116-2  | KRAS        | -                            | -            | -                                            | -            | -                             | -            |
| Q5JWF2    | GNAS        | 41                           | 62           | 10                                           | 8            | 4                             | 6            |
| P36404    | ARL2        | 23.0                         | 58.0         | 6.0                                          | 15.0         | 4                             | 9            |
| Q9BX10    | GTPBP2      | 13.3                         | 44.0         | 22.6                                         | 54.8         | 20                            | 40           |
| P19784    | CSNK2A2     | 21.1                         | 52.4         | 6.5                                          | 12.9         | 10                            | 15           |
| Q9BVP2    | GNL3        | 19.9                         | 49.4         | 22.6                                         | 51.6         | 5                             | 25           |
| O60841    | EIF5B       | 22.3                         | 56.6         | 25.8                                         | 58.1         | 30                            | 65           |
| Q9NTK5    | OLA1        | 24.1                         | 60.2         | 29.0                                         | 58.1         | 15                            | 55           |
